# Supplementary material for: Do musicians learn a fine sequential hand motor skill differently than non-musicians?
Source: PLOS journal article supplement (doi:10.1371/journal.pone.0207449), 2018-11-21
Supplement: S1 (10.1371/journal.pone.0207449.s001) [file journal.pone.0207449.s001]

# S1 File. Additional results on RT in the test phase.

The results of training with motor execution revealed a faster execution of the sequences by musicians than by non-musicians,  $F(1, 22) = 11.21$ ,  $p = .003$ ,  $\eta_p^2 = .34$ . Furthermore, unfamiliar sequences were executed slower than familiar executed sequences,  $F(1, 22) = 26.6$ ,  $p < .001$ ,  $\eta_p^2 = .55$ . Most importantly, a significant interaction between Type of Sequence and Group was observed,  $F(1, 22) = 8.21$ ,  $p = .009$ ,  $\eta_p^2 = .22$ . Separate  $t$ -tests (one-tailed) were performed for each group (detailed results are presented in Table 1). The results for musicians revealed that unfamiliar sequences were executed significantly slower than familiar executed sequences,  $t(11) = 3.1$ ,  $p = .005$ ; and for non-musicians the results also revealed that unfamiliar sequences were executed significantly slower than familiar executed sequences,  $t(11) = 2.92$ ,  $p = .01$ . Inspection of Fig 5 shows a large difference in mean RTs between unfamiliar and familiar executed sequences for non-musicians (62 ms), while this difference was clearly much smaller for musicians (19 ms), which explains the observed interaction. Again a main effect of Key was observed,  $F(4, 88) = 48.79$ ,  $\epsilon = .05$ ,  $p < 0.001$ ,  $\eta_p^2 = .69$ , and an interaction between Key and Group was observed,  $F(4, 88) = 6.26$ ,  $p = .01$ ,  $\eta_p^2 = .22$ , (a linear trend:  $F(1, 22) = 5.82$ ,  $p < .03$ ; a quadratic trend:  $F(1, 22) = 7.94$ ,  $p = .01$ ). No significant interaction between Type of Sequence and Key was observed,  $F(4, 88) = 2.35$ ,  $\epsilon = .73$ ,  $p = .08$ ,  $\eta_p^2 = .1$ .

**Table 1.** Results of  $t$ -tests on RT for each group comparing different types of sequence (i.e., familiar imagined, familiar executed, familiar withheld, and unfamiliar). \*  $p < 0.05$  (one-tailed test).

| Type of sequence                      | Musicians |               | Non-musicians |               |
|---------------------------------------|-----------|---------------|---------------|---------------|
|                                       | $t(11)$   | $p$           | $t(11)$       | $p$           |
| Unfamiliar – familiar executed        | 3.1       | <b>0.005*</b> | 2.92          | <b>0.005*</b> |
| Unfamiliar – familiar withheld        | 1.55      | 0.08          | 1.48          | 0.09          |
| Unfamiliar – familiar imagined        | 3.99      | <b>0.001*</b> | 2.0           | <b>0.04*</b>  |
| Familiar imagined – familiar executed | 0.51      | 0.31          | 0.89          | 0.2           |

|                                       |      |              |      |      |
|---------------------------------------|------|--------------|------|------|
| Familiar withheld – familiar executed | 1.95 | <b>0.04*</b> | 1.17 | 0.14 |
| Familiar withheld – familiar imagined | 1.59 | 0.07         | 1.08 | 0.15 |

---

Results for the comparison of familiar imagined and unfamiliar sequences again revealed faster responses for musicians than for non-musicians,  $F(1,22) = 13.35$ ,  $p = .001$ ,  $\eta_p^2 = .38$ . Unfamiliar sequences were executed slower than familiar imagined sequences,  $F(1, 22) = 9.45$ ,  $p = .006$ ,  $\eta_p^2 = .3$ . No significant interaction between Type of Sequence and Group was observed,  $F(1, 22) = .91$ ,  $p = .35$ ,  $\eta_p^2 = .04$ . These results show that training with motor imagery was not more beneficial for musicians compared with non-musicians. Again, a main effect of Key,  $F(4,88) = 47.9$ ,  $\epsilon = .39$ ,  $p < 0.001$ ,  $\eta_p^2 = .69$ , and an interaction between Key and Group was observed,  $F(4,88) = 4.74$ ,  $p = .02$ ,  $\eta_p^2 = .18$ , (a quadratic trend,  $F(1,22) = 6.85$ ,  $p < .02$ ). No significant interaction between Type of Sequence and Key was observed,  $F(4, 88) = 1.96$ ,  $\epsilon = .82$ ,  $p = .12$ ,  $\eta_p^2 = .08$ .
